# Supplementary material for: Birth Weight in Relation to Leisure Time Physical Activity in Adolescence and Adulthood: Meta-Analysis of Results from 13 Nordic Cohorts
Source: PLOS journal article supplement (doi:10.1371/journal.pone.0008192), 2009-12-15
Supplement: S2 (10.1371/journal.pone.0008192.s002) [file journal.pone.0008192.s002]

| <b>Birth<br/>weight; kg</b> | <b>Unadjusted<sup>1</sup></b> | <b>Adjusted for<br/>gestational age<sup>1</sup></b> | <b>Unadjusted<sup>1</sup></b> | <b>Adjusted for<br/>education<sup>1</sup></b> | <b>Unadjusted<sup>2</sup></b> | <b>Adjusted for<br/>body mass<br/>index<sup>2</sup></b> | <b>Unadjusted<sup>3</sup></b> | <b>Adjusted for<br/>smoking<sup>3</sup></b> |
|-----------------------------|-------------------------------|-----------------------------------------------------|-------------------------------|-----------------------------------------------|-------------------------------|---------------------------------------------------------|-------------------------------|---------------------------------------------|
| <b>1.26-1.75</b>            | 0.92 [0.47, 1.78]             | 0.90 [0.46, 1.74]                                   | 0.57 [0.36, 0.91]             | 0.61 [0.38, 0.97]                             | 0.61 [0.39, 0.95]             | 0.68 [0.42, 1.10]                                       | 0.59 [0.34, 1.02]             | 0.59 [0.36, 0.95]                           |
| <b>1.76-2.25</b>            | 0.32 [0.04, 2.26]             | 0.24 [0.02, 2.50]                                   | 0.58 [0.37, 0.91]             | 0.60 [0.38, 0.95]                             | 0.70 [0.50, 0.99]             | 0.76 [0.56, 1.02]                                       | 0.68 [0.45, 1.01]             | 0.69 [0.45, 1.06]                           |
| <b>2.26-2.75</b>            | 0.91 [0.78, 1.07]             | 0.91 [0.71, 1.16]                                   | 0.95 [0.82, 1.09]             | 0.93 [0.80, 1.09]                             | 0.91 [0.80, 1.03]             | 0.93 [0.74, 1.18]                                       | 0.96 [0.83, 1.10]             | 0.95 [0.82, 1.10]                           |
| <b>2.76-3.25</b>            | 0.97 [0.88, 1.07]             | 0.90 [0.75, 1.08]                                   | 0.93 [0.85, 1.03]             | 0.93 [0.83, 1.05]                             | 0.96 [0.89, 1.04]             | 0.95 [0.77, 1.18]                                       | 0.96 [0.88, 1.05]             | 0.95 [0.87, 1.05]                           |
| <b>3.26-3.75</b>            | 1.0 (ref)                     | 1.0 (ref)                                           | 1.0 (ref)                     | 1.0 (ref)                                     | 1.0 (ref)                     | 1.0 (ref)                                               | 1.0 (ref)                     | 1.0 (ref)                                   |
| <b>3.76-4.25</b>            | 1.01 [0.91, 1.12]             | 0.87 [0.70, 1.08]                                   | 1.03 [0.91, 1.17]             | 1.03 [0.88, 1.19]                             | 1.03 [0.94, 1.13]             | 1.04 [0.83, 1.31]                                       | 1.04 [0.94, 1.15]             | 1.04 [0.93, 1.15]                           |
| <b>4.26-4.75</b>            | 1.06 [0.86, 1.31]             | 1.17 [0.78, 1.78]                                   | 0.84 [0.67, 1.07]             | 0.84 [0.65, 1.08]                             | 0.95 [0.79, 1.13]             | 0.90 [0.68, 1.19]                                       | 0.96 [0.79, 1.16]             | 0.92 [0.76, 1.11]                           |
| <b>4.76-5.25</b>            | 1.01 [0.43, 2.38]             | 0.49 [0.14, 1.67]                                   | 0.93 [0.52, 1.65]             | 0.95 [0.53, 1.71]                             | 0.91 [0.57, 1.43]             | 0.95 [0.56, 1.61]                                       | 0.98 [0.51, 1.90]             | 0.98 [0.50, 1.93]                           |

Odds ratio [95% confidence limits] for each birth weight category.

<sup>1</sup> Based on 10 cohorts.

<sup>2</sup> Based on all 13 cohorts.

<sup>3</sup> Based on 12 cohorts.
